# Supplementary figures and images for: Patient Outcomes of Flexible Assertive Community Treatment Compared With Assertive Community Treatment
Source: Atypon-hosted journal article supplement (doi:10.1176/appi.ps.20220235), 2022-12-07

**Figure:** Flow chart of the recruitment process

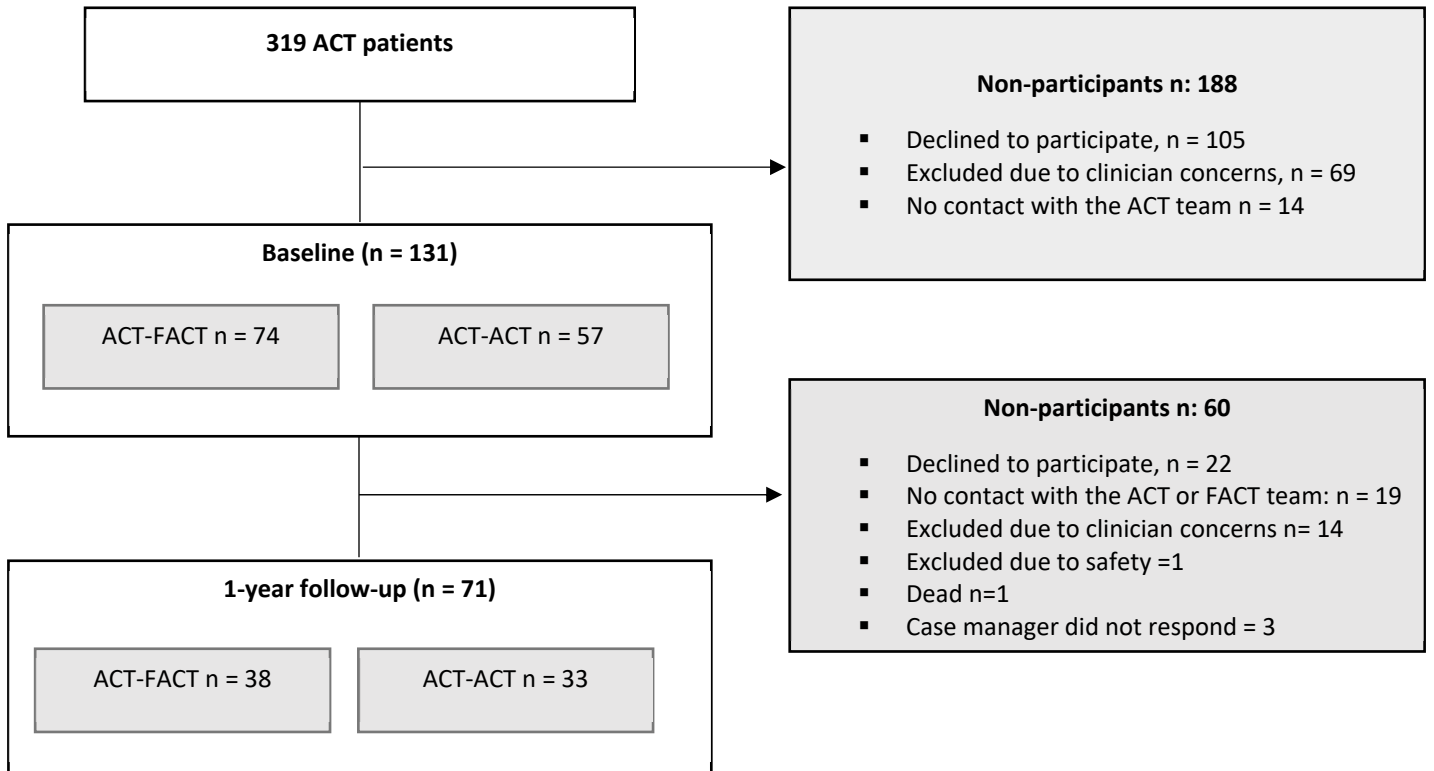

Supplement: appi.ps.20220235.ds001.pdf [file appi.ps.20220235.ds001.pdf]
